# Supplementary material
Source: PubMed Central journal article supplement (PMC7350991)
Supplement: ASN.2019080852SupplementaryData.pdf [file ASN.2019080852SupplementaryData.pdf]

## **Gut Microbial Metabolites Induce Donor Specific Tolerance of Kidney Allografts through SCFA**

### **Induction of T Regulatory Cells**

Huiling Wu, Julian Singer, Tony K Kwan, Yik Wen Loh, Chuanmin Wang, Jian Tan, Yan J Li, Sum Wing Christina Lai, Laurence Macia, Stephen I Alexander, and Steven J Chadban

### **Table of Contents:**

#### **Methods**

- Kidney Transplantation
- Histology
- Immunohistochemistry
- Immunofluorescence

#### **Results**

- Supplemental Figure 1. Multiple sample rarefaction curves
- Supplemental Figure 2. Richness of gut microbial communities in allograft and isograft mice.
- Supplemental Figure 3. Dominant phylum of WT C57Bl/6 mice fed a zero-fiber diet
- Supplemental Figure 4. Cytokine and chemokine mRNA expression in allografts at D100
- Supplemental Figure 5. HDAC activity in renal allografts
- Supplemental Table 1. Nutritional parameters of high-fiber and normal mouse chow used in experiments
- Supplemental Table 2. DESeq2 analysis of differential microbial abundance in NC fed isograft pre and post-transplant
- Supplemental Table 3. DESeq2 analysis of differential microbial abundance in NC and HF fed mice
- Supplemental Table 4. DESeq2 analysis of differential microbial abundance in NC+Allo and HF+Allo mice

## **Methods:**

### **Kidney Transplantation:**

Heterotopic kidney transplants were performed with the left kidney of the donor animal flushed with heparinized saline and removed together with the ureter and vessels en mass, including a small (1-2mm) bladder cuff attached to the distal ureter. The recipient animal underwent a left sided nephrectomy and the transplanted kidney was placed heterotopically in the left iliac fossa on day zero. Urinary tract reconstruction was established by either inserting the ureter into the bladder (day 14 experiment only) or by suturing the bladder patch to a cystotomy located on the bladder dome (a bladder-to-bladder anastomosis) for survival study and day 100 experiments. All mice received induction and maintenance anesthesia with inhaled isoflurane and were monitored throughout procedures. All recipient allograft mice received a single, intra-peritoneal injection of ampicillin at the time of transplant surgery with the exception of mice on diet experiments or microbiota analysis, which did not receive any antibiotics. No immunosuppressive therapy was administered. The recipient's right native kidney was removed at day 3-7, rendering the graft to be life-sustaining. Animals with technical graft failure or wound infection became overtly ill (and were euthanized) or died within 4 days of the contralateral nephrectomy and were removed from the study.

### **Histology**

Periodic acid-Schiff (PAS) staining was performed on 3  $\mu$ m paraffin embedded kidney sections to assess tubulitis (day 14 group only), glomerulosclerosis and interstitial fibrosis. Picro-Sirius red (PSR) staining was performed on 5  $\mu$ m paraffin embedded sections of the kidney (D100 group only) to assess for interstitial collagen deposition. Scoring systems for each histological parameter have been previously described in detail, we summarize them briefly below. All histological analysis was performed in a blinded manner.

Tubulitis was examined on 250 tubular cross-sections per animal. Each tubular cross section was assessed as either, i) normal, ii) mild tubulitis (one infiltrating mononuclear cell per tubular cross-section), iii) moderate

tubulitis (two or three infiltrating mononuclear cells per tubular cross-section and disruption of the basement membrane), or iv) severe tubulitis (defined as  $\geq$  four infiltrating mononuclear cells per tubular cross-section). A score for the degree of tubulitis was calculated for each animal, whereby each normal tubule received a score of 0, with mild tubulitis assigned a value of 1, and the number of tubules affected with mild and severe tubulitis was multiplied by 2 or 3 respectively. The total tubulitis score for each animal was the sum of these figures.

Glomerulosclerosis was quantitated by the presence of PAS-positive staining material involving  $>30\%$  of each glomerulus. All glomeruli per section were scored to determine the percentage of glomeruli displaying glomerulosclerosis.

Interstitial fibrosis and tubular atrophy was graded following the Banff 97 scoring criteria on a scale of 0 to 3: 1 = mild interstitial fibrosis and tubular atrophy ( $<25\%$  of cortical area); 2 = moderate interstitial fibrosis and tubular atrophy (26–50% of cortical area); 3 = severe interstitial fibrosis and tubular atrophy/loss ( $>50\%$  of cortical area). If changes were minimal but not absent, the score of 0.5 was applied. Using an ocular grid, the score of each sample was counted in at least 15-25 consecutive fields across a full section (x 400 magnification) and was averaged for each graft.

Interstitial PSR staining for collagen was assessed by point counting using an ocular grid in at least 15 consecutive fields (x 400 magnification). Only interstitial collagen was counted, with collagen surrounding vessels and glomeruli excluded. The result was expressed as the number of interstitial grid points positive over the total number of interstitial grid points assessed per field.

### **Immunohistochemistry staining**

Acetone-fixed frozen sections (7  $\mu\text{m}$ ) were exposed to 0.06%  $\text{H}_2\text{O}_2$  in PBS for 10 minutes, and subsequently blocked with an avidin-biotin blocking system (DAKO North America Inc. Ca., USA.) followed by 20% normal horse serum in PBS. Primary antibody consisting of rat anti-mouse CD68 antibody (clone FA-11, AbD Serotec MCA1957), CD4 (clone RM4-5, BD Pharmingen 550280), CD8 (clone 53-6.7, BD Pharmingen 550281), FoxP3 (clone FJK-16s eBioscience 14-5773-82), or hamster anti-mouse CD11c (clone HL3, BD Pharmingen 550283) was applied to the sections for 60 min. Concentration-matched IgG was used as an isotype negative control. Sections were incubated with the appropriate biotinylated secondary antibody: anti-

rat IgG or anti-hamster IgG (BD Pharminogen). Vector stain ABC kit (Vector Laboratories Inc.) was applied to the tissue followed by 3,3'-diaminobenzidine (DAB) substrate-chromogen solution (DAKO North America Corporation Inc. CA., USA.) Slides were counterstained with Harris' haematoxylin.

### **Quantification of immunohistochemistry**

Analysis of the cellular infiltrates for CD4, CD8 and Foxp3 was performed in a blinded manner, by assessing 20 consecutive high-power fields (HPFs, x 400 magnification) of the cortex in each section. Using an ocular grid, the number of cells staining positively for each antibody was counted and expressed as cells per HPF. Analysis of CD68 and CD11c infiltrates was performed using a digital image analysis program (Image-Pro Premier 9.0, Media Cybernetics). An area of cortex was analyzed for interstitial cellular positive staining versus counter-stained area. The results were expressed as percentage of positive staining per HPF.

### **Immunofluorescence**

For C4d immunofluorescent staining, frozen sections were blocked with 1% BSA in PBS for 20 minutes and incubated with rat anti-mouse antibodies to C4d (Abcam plc, Cambridge, UK) for 60 min followed by anti-rat IgG conjugated with AlexaFluor 488 (Molecular Probes, Eugene, OR). Staining for C4d was considered positive when the peritubular capillaries were diffusely (all high-power fields) and brightly stained. Scoring of C4d staining was based on the percentage of stained tissue on immunofluorescence that had a linear, circumferential staining pattern in PTCs following the Banff 97 scoring criteria on a scale of 0 to 3: 0 = Negative: 0%; 1 = Minimal C4d stain/detection: 1<10%; 2 = Focal C4d stain/positive: 10–50%; 3 = Diffuse C4d stain/positive: >50%.

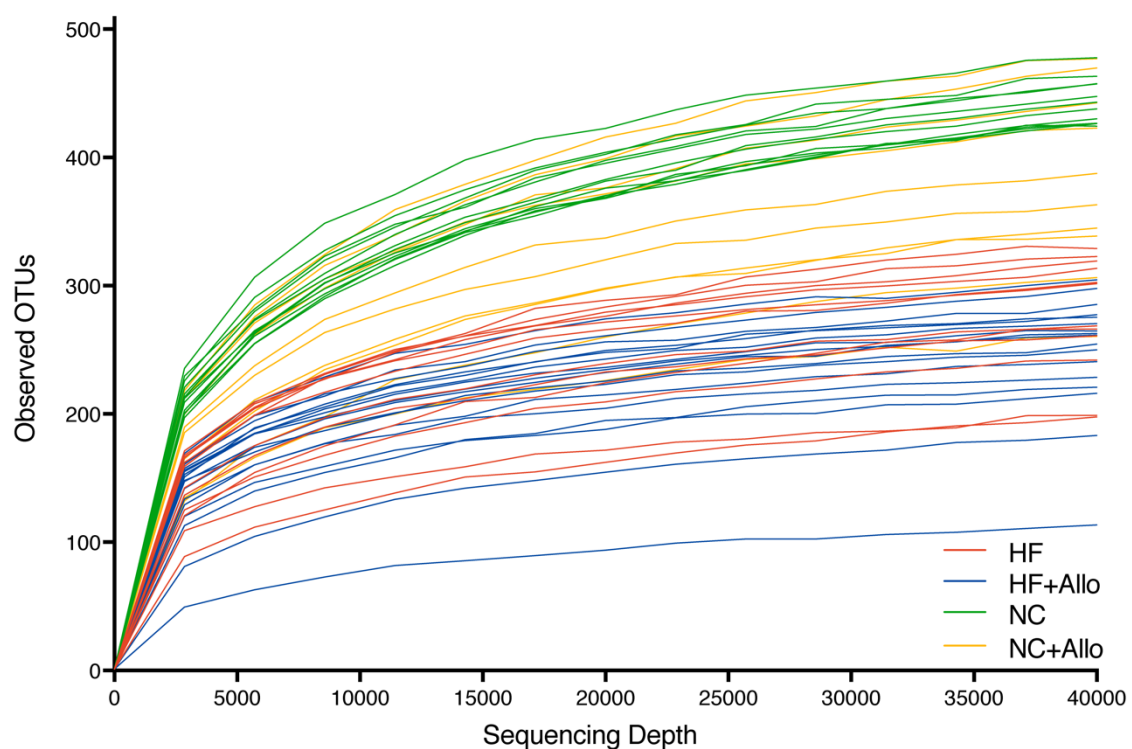

**Supplemental Figure 1. Multiple sample rarefaction curve based on 16S rRNA gene sequencing.**

HF n=12; NC n=12; NC+Allo n=10; HF+Allo n=16

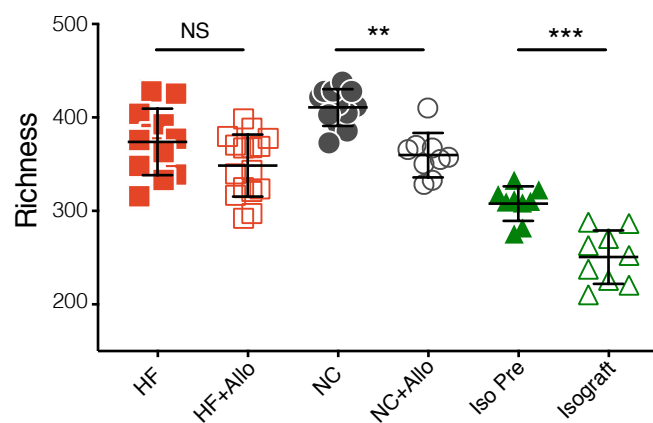

**Supplemental Figure 2. Richness of gut microbial communities in allograft and isograft mice.**

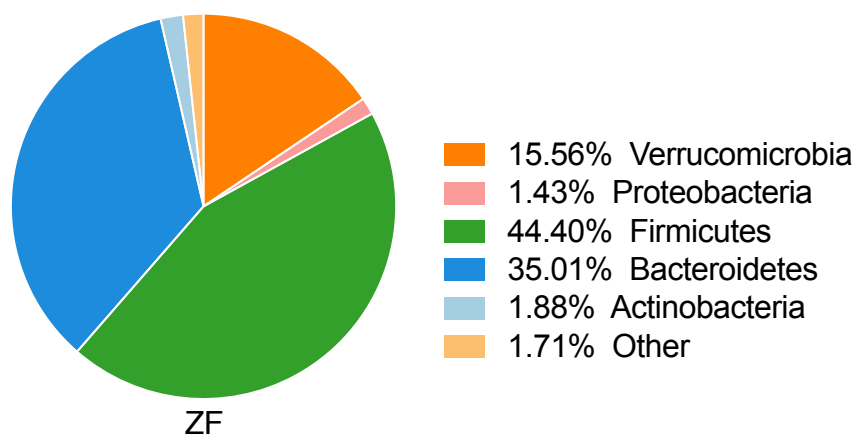

**Supplemental Figure 3. Dominant phylum of WT C57BL/6 mice fed a zero-fiber diet.** WT mice fed a fiber restricted diet develop dysbiosis with expansion of the phylum Verrucomicrobia. (n=10)

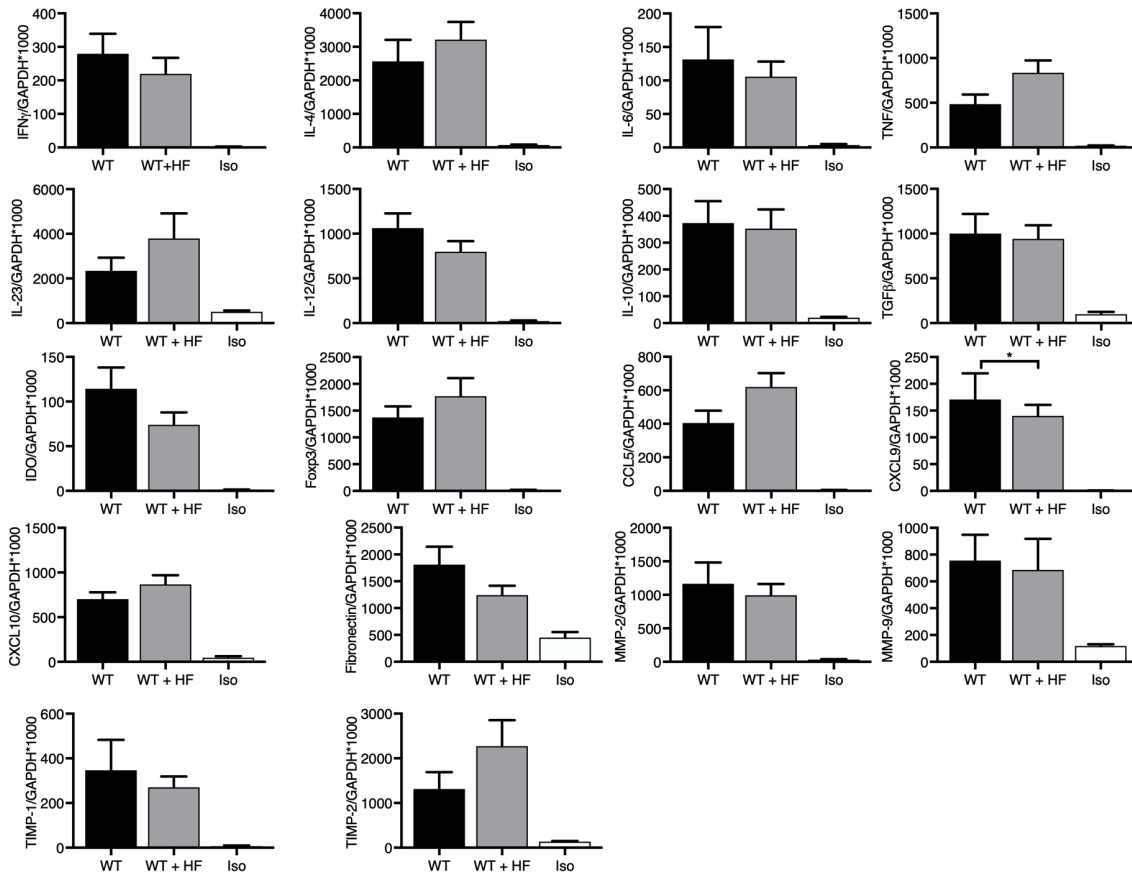

**Supplemental Figure 4. Cytokine and Chemokine mRNA expression in WT and WT+HF allografts, and WT isografts at day 100 post-transplant.** Similar to WT-allografts, HF fed allograft mice demonstrated a marked upregulation of cytokines, chemokines, and genes involved in tissue remodeling as compared to isografts. WT+HF mice demonstrated a decrease in the expression of chemokine CXCL9 as compared to WT allograft mice ( $P < 0.05$ ). WT  $n=9$ , WT+HF  $n=9$ , isografts  $n=5$ . P values by one-way ANOVA. \* $P < 0.05$

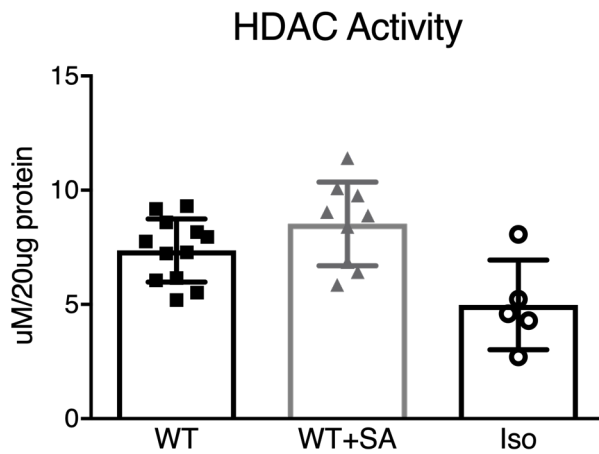

**Supplemental Figure 5. HDAC activity in transplanted kidneys was not upregulated by SA supplementation .** Compared to WT allograft mice, WT+SA allograft mice did not demonstrate a significant change in HDAC activity ( $P=0.2731$ ). WT  $n=12$ , WT+SA  $n=9$ , Iso  $n=5$ . P values by one-way ANOVA.

| Nutritional Parameter                         | Normal Chow | High-Fiber |
|-----------------------------------------------|-------------|------------|
| Protein (%)                                   | 19          | 13.2       |
| Total Fat (%)                                 | 4.6         | 4.5        |
| Crude Fiber (%)                               | 5.2         | 35.0       |
| Acid Detergent Fiber (%)                      | -           | 35.0       |
| Digestible Energy (MJ/kg)                     | 14.2        | 11.0       |
| Total Calculated Energy from Carbohydrate (%) | 59.9        | 58.7       |
| Total Calculated Energy from Protein (%)      | 23          | 19.7       |
| Total Calculated Energy from Lipids (%)       | 12          | 15.0       |

**Supplemental Table 1. Nutritional parameters of high-fiber and normal mouse chow used in experiments.**

Deseq2: Significant OTUs Pre-Isograft vs Isograft Mice

|      | baseMean | log2FoldChange | lfcSE   | stat     | pvalue   | padj    | Rank2            | Rank3          | Rank4            | Rank5                 | Rank6              |
|------|----------|----------------|---------|----------|----------|---------|------------------|----------------|------------------|-----------------------|--------------------|
| 37d7 | 269.7341 | -1.4682        | 0.33194 | -4.42308 | 9.73E-06 | 0.00035 | p__Bacteroidetes | c__Bacteroidia | o__Bacteroidales | f__Porphyromonadaceae | g__Parabacteroides |

**Supplemental Table 2. DESeq2 analysis demonstrating differential abundance of significant OTUs at the genus level (FDR adjusted p value < 0.01) between isograft recipients, pre and 2 weeks following isograft-placement.**

Deseq2: Significant OTUs NC v HF

|         | baseMean   | log2FoldChange | lfcSE      | stat       | pvalue     | padj       | Rank2              | Rank3                  | Rank4                 | Rank5                  | Rank6                        |
|---------|------------|----------------|------------|------------|------------|------------|--------------------|------------------------|-----------------------|------------------------|------------------------------|
| 180107  | 337.997638 | 1.25712714     | 0.41221822 | 3.04966421 | 0.00229097 | 0.00646863 | p__Firmicutes      | c__Clostridia          | o__Clostridiales      | f__Ruminococcaceae     | g__Ruminococcus              |
| 323024  | 37.5128584 | 6.44311967     | 1.27498867 | 5.0534721  | 4.34E-07   | 2.97E-06   | p__Tenericutes     | c__Mollicutes          | o__RF39               | f__                    | g__                          |
| 263705  | 8.84691163 | 4.82531286     | 0.83718449 | 5.76373896 | 8.23E-09   | 9.87E-08   | p__Firmicutes      | c__Clostridia          | o__Clostridiales      | f__Peptococcaceae      | g__                          |
| 363731  | 4901.67386 | -4.0497423     | 0.66609898 | -6.0797906 | 1.20E-09   | 1.93E-08   | p__Verrucomicrobia | c__Verrucomicrobiae    | o__Verrucomicrobiales | f__Verrucomicrobiaceae | g__Akkermansia               |
| 180869  | 41.5894473 | 4.16699017     | 1.22476158 | 3.40228683 | 0.00066824 | 0.00229112 | p__Firmicutes      | c__Erysipelotrichi     | o__Erysipelotrichales | f__Erysipelotrichaceae | g__                          |
| 444791  | 719.772719 | 2.34417242     | 0.62334656 | 3.7606246  | 0.00016949 | 0.00062581 | p__Cyanobacteria   | c__4C0d-2              | o__YS2                | f__                    | g__                          |
| 780650  | 72.0221425 | 4.52100366     | 0.68796399 | 6.57157021 | 4.98E-11   | 1.19E-09   | p__Firmicutes      | c__Clostridia          | o__Clostridiales      | f__Clostridiaceae      | g__                          |
| 1684221 | 283.245117 | -1.5515791     | 0.49489642 | -3.1351593 | 0.00171761 | 0.00515282 | p__Proteobacteria  | c__Deltaproteobacteria | o__Desulfovibrionales | f__Desulfovibrionaceae | g__Desulfovibrio             |
| OTU220  | 283.016401 | 1.89250587     | 0.55987963 | 3.38020134 | 0.00072433 | 0.00231785 | p__Proteobacteria  | c__Alphaproteobacteria | o__RF32               | f__                    | g__                          |
| 1136443 | 27.1575525 | -4.9111887     | 1.03285481 | -4.7549653 | 1.98E-06   | 1.19E-05   | p__Deferribacteres | c__Deferribacteres     | o__Deferribacterales  | f__Deferribacteraceae  | g__Mucispirillum             |
| 22668   | 15.9244237 | 4.72749781     | 1.05258323 | 4.49132923 | 7.08E-06   | 3.40E-05   | p__Firmicutes      | c__Clostridia          | o__Clostridiales      | f__Clostridiaceae      | g__Candidatus<br>Arthromitus |
| 1107027 | 5549.48278 | -2.5278564     | 0.54581097 | -4.6313772 | 3.63E-06   | 1.94E-05   | p__Firmicutes      | c__Bacilli             | o__Lactobacillales    | f__Lactobacillaceae    | g__Lactobacillus             |
| 997439  | 8487.29121 | -3.6404419     | 0.68481853 | -5.3159221 | 1.06E-07   | 8.49E-07   | p__Actinobacteria  | c__Actinobacteria      | o__Bifidobacteriales  | f__Bifidobacteriaceae  | g__Bifidobacterium           |
| 338644  | 48.4806212 | 1.26437036     | 0.30396756 | 4.15955682 | 3.19E-05   | 0.00013914 | p__Actinobacteria  | c__Coriobacteriia      | o__Coriobacteriales   | f__Coriobacteriaceae   | g__Adlercreutzia             |
| 589277  | 5686.25973 | -3.5039549     | 0.41566534 | -8.42975   | 3.46E-17   | 1.66E-15   | p__Bacteroidetes   | c__Bacteroidia         | o__Bacteroidales      | f__Bacteroidaceae      | g__Bacteroides               |
| 839200  | 200.959355 | 3.09877931     | 0.56380796 | 5.49616099 | 3.88E-08   | 3.73E-07   | p__Firmicutes      | c__Clostridia          | o__Clostridiales      | f__Lachnospiraceae     | g__Dorea                     |
| 372622  | 158.313804 | 1.66402245     | 0.43192768 | 3.85254873 | 0.00011689 | 0.00046758 | p__Firmicutes      | c__Clostridia          | o__Clostridiales      | f__Lachnospiraceae     | g__Coprococcus               |

**Supplemental Table 3. DESeq2 analysis demonstrating differential abundance of significant OTUs at the genus level (FDR adjusted p value < 0.01) between NC and HF fed mice**

Deseq2: Significant OTUs NC+Allo v HF+Allo

|         | baseMean  | log2FoldChange | lfcSE    | stat        | pvalue      | padj      | Rank2              | Rank3               | Rank4                | Rank5                 | Rank6                        |
|---------|-----------|----------------|----------|-------------|-------------|-----------|--------------------|---------------------|----------------------|-----------------------|------------------------------|
| 696563  | 76.412471 | -26.48346386   | 3.068907 | -8.62960562 | 6.16E-18    | 1.48E-16  | p__Firmicutes      | c__Clostridia       | o__Clostridiales     | f__Lachnospiraceae    | g__Blautia                   |
| 187768  | 8867.6480 | -1.915591554   | 0.361279 | -5.30223721 | 1.14E-07    | 6.86E-07  | p__Firmicutes      | c__Clostridia       | o__Clostridiales     | f__                   | g__                          |
| 180107  | 337.99763 | 1.418430243    | 0.402489 | 3.52414028  | 0.000424859 | 0.0014566 | p__Firmicutes      | c__Clostridia       | o__Clostridiales     | f__Ruminococcaceae    | g__Ruminococcus              |
| 264240  | 1464.7510 | -1.681575223   | 0.363969 | -4.6201005  | 3.84E-06    | 1.84E-05  | p__Bacteroidetes   | c__Bacteroidia      | o__Bacteroidales     | f__Rikenellaceae      | g__                          |
| OTU554  | 61.153891 | 9.339921041    | 0.971742 | 9.61152050  | 7.15E-22    | 3.43E-20  | p__Bacteroidetes   | c__Bacteroidia      | o__Bacteroidales     | f__Rikenellaceae      | g__Rikenella                 |
| 323024  | 37.512858 | 6.678376416    | 1.301158 | 5.13263856  | 2.86E-07    | 1.52E-06  | p__Tenericutes     | c__Mollicutes       | o__RF39              | f__                   | g__                          |
| 263705  | 8.8469116 | 2.747841117    | 0.742125 | 3.70266291  | 0.000213348 | 0.0007877 | p__Firmicutes      | c__Clostridia       | o__Clostridiales     | f__Peptococcaceae     | g__                          |
| 363731  | 4901.6738 | 2.269838261    | 0.649579 | 3.49432151  | 0.000475268 | 0.0015208 | p__Verrucomicrobia | c__Verrucomicrobiae | o__Verrucomicrobiale | f__Verrucomicrobiacea | g__Akkermansia               |
| OTU152  | 115.85461 | 4.825780024    | 0.774636 | 6.22973761  | 4.67E-10    | 4.49E-09  | p__Firmicutes      | c__Bacilli          | o__Bacillales        | f__Staphylococcaceae  | g__Staphylococcus            |
| 780650  | 72.022142 | 3.797212847    | 0.662794 | 5.7290925   | 1.01E-08    | 6.92E-08  | p__Firmicutes      | c__Clostridia       | o__Clostridiales     | f__Clostridiaceae     | g__                          |
| 1136443 | 27.157552 | -7.97276023    | 1.098077 | -7.26065628 | 3.85E-13    | 4.62E-12  | p__Deferribacteres | c__Deferribacteres  | o__Deferribacterales | f__Deferribacteraceae | g__Mucispirillum             |
| 22668   | 15.924423 | 4.757650907    | 1.050405 | 4.52934675  | 5.92E-06    | 2.58E-05  | p__Firmicutes      | c__Clostridia       | o__Clostridiales     | f__Clostridiaceae     | g__Candidatus<br>Arthromitus |
| OTU45   | 40.638197 | 10.70153101    | 2.645877 | 4.0446050   | 5.24E-05    | 0.0002096 | p__Firmicutes      | c__Bacilli          | o__Turicibacterales  | f__Turicibacteraceae  | g__Turicibacter              |
| 997439  | 8487.2912 | -2.14056513    | 0.668522 | -3.2019329  | 0.001365088 | 0.0040952 | p__Actinobacteria  | c__Actinobacteria   | o__Bifidobacteriales | f__Bifidobacteriaceae | g__Bifidobacterium           |
| 342873  | 807.37847 | -3.130335277   | 0.509779 | -6.14056337 | 8.22E-10    | 6.58E-09  | p__Bacteroidetes   | c__Bacteroidia      | o__Bacteroidales     | f__Porphyromonadacea  | g__Parabacteroides           |
| 589277  | 5686.2597 | -3.198392568   | 0.405763 | -7.88239948 | 3.21E-15    | 5.14E-14  | p__Bacteroidetes   | c__Bacteroidia      | o__Bacteroidales     | f__Bacteroidaceae     | g__Bacteroides               |

**Supplemental Table 4. DESeq2 analysis demonstrating differential abundance of significant OTUs at the genus level (FDR adjusted p value < 0.01) between NC+Allo and HF+Allo mice**
